# Supplementary material for: Efficient separation of CH 4 /C 2 H 6 /C 3 H 8 enabled by an indium-tetracarboxylate MOF with cross-channel and amino sites
Source: Royal Society of Chemistry journal article supplement (doi:10.1039/d5dt02718g), 2026-01-01
Supplement: d5dt02718g1.pdf [file d5dt02718g1.pdf]

## ***Supporting Information***

### **Efficient separation of CH<sub>4</sub>/C<sub>2</sub>H<sub>6</sub>/C<sub>3</sub>H<sub>8</sub> enabled by an indium-tetracarboxylate MOF with cross-channel and amino sites**

Chaohui He,<sup>\*a</sup> Jinglin Guo,<sup>a</sup> Rajamani Krishna,<sup>b</sup> Zhenzhen Jia,<sup>a</sup> Yujuan Zhang,<sup>a</sup> Xiao-

Qing Wang<sup>\*a</sup> and Tuoping Hu<sup>\*a</sup>

*<sup>a</sup>Department of Chemistry, College of Chemistry and Chemical Engineering, North  
University of China, Taiyuan, 030051, Shanxi, P. R. China*

*<sup>b</sup>Van't Hoff Institute for Molecular Sciences, University of Amsterdam, Science Park  
904, 1098 XH Amsterdam, The Netherlands.*

## 1.1 Materials

All chemicals and reagents were obtained from commercial sources. Ethanol (99.5%), *N,N*-Dimethylacetamide (DMA, AR), HNO<sub>3</sub> (65%), and Indium(III) chloride tetrahydrate (InCl<sub>3</sub>·4H<sub>2</sub>O, 99.9%) were obtained from Aladdin. Biphenyl-3,3',5,5'-tetracarboxylic acid (H<sub>4</sub>bptc, 98%) and 4,4'-diamino-[1,1'-biphenyl]-3,3',5,5'-tetracarboxylic acid (H<sub>4</sub>bptc-NH<sub>2</sub>, 98%) were purchased from Yanshen Technology Co., Ltd. N<sub>2</sub> (99.999%), CH<sub>4</sub> (99.99%), C<sub>2</sub>H<sub>6</sub> (99.99%), and C<sub>3</sub>H<sub>8</sub> (99.99%) were used for single-component adsorption.

## 1.2 Preparation of InOF-12 and NUC-301

InOF-12 was prepared according to a method previously reported in the literature.<sup>1</sup>

NUC-301: A mixture of InCl<sub>3</sub> (33 mg), H<sub>4</sub>bptc-NH<sub>2</sub> (36 mg), DMA (3 mL), ethanol (3 mL), and HNO<sub>3</sub> (240 μL) was placed in a 20 mL glass vial and sonicated for 30 minutes to ensure complete dissolution. The vial was then heated statically at 85 °C in an oven for 5 days. After cooling to room temperature, the resulting product was collected by filtration, washed three times with a mixture of DMA and ethanol, and dried under ambient conditions before final collection. The microcrystalline powder of NUC-301 were obtained in 39% yield based on H<sub>4</sub>bptc-NH<sub>2</sub>. Elemental analysis (%): Calcd for C<sub>16</sub>H<sub>8</sub>InN<sub>2</sub>O<sub>8</sub>, C 40.8, H 1.71, N 5.95; Found, C 40.61, H 1.93, N 5.18.

## 1.3 Characterization and equilibrium adsorption experiments

Powder X-ray diffraction (PXRD) characterization of NUC-301 was carried out with a Bruker D8 Advance diffractometer (Cu Kα radiation). The thermal stability of

the samples was assessed via thermogravimetric analysis (TGA), using a NETZSCH STA 449F5 thermal analyzer under a nitrogen (N<sub>2</sub>) atmosphere. The temperature was ramped from ambient conditions to 1073 K at a heating rate of 10 K/min. Elemental analysis (C, H, N) was performed using an Elemental Unicube analyzer. Fourier transform infrared (FT-IR) spectra were recorded on a Thermo Fisher Scientific Nicolet iS20 spectrometer. Meanwhile, 77 K N<sub>2</sub> adsorption-desorption isotherms were acquired with a BSD-660 instrument. Before gas sorption analysis, the prepared samples were first subjected to low-boiling-point solvent exchange for 3 days, with the solvent replaced every 12 hours. After the completion of solvent exchange, the samples were treated at 353 K for 12 hours under high-vacuum conditions. The static pure component adsorption isotherms of NUC-301 for CH<sub>4</sub>, C<sub>2</sub>H<sub>6</sub>, and C<sub>3</sub>H<sub>8</sub> were measured at a BSD-660 at 288 and 298 K, respectively.

#### 1.4 Isosteric heat of adsorption

The adsorption heat ( $Q_{st}$ ) is defined as follows:

$$Q_{st} = RT^2 \left( \frac{\partial \ln p}{\partial T} \right)_q$$

R is a constant, T indicates the temperature (K), P represents the pressure (kPa) and q is the adsorption amount (mmol/g). These values were calculated using the Clausius-Clapeyron equation based on the single-component adsorption data collected from 0–1 bar at 288 and 298 K, respectively.

#### 1.5 Ideal adsorbed solution theory (IAST) calculations

The single-component adsorption isotherms of CH<sub>4</sub>, C<sub>2</sub>H<sub>6</sub> and C<sub>3</sub>H<sub>8</sub> on NUC-301 obtained at 298 K were fitted using the dual-site Langmuir-Freundlich model.

$$q = q_{A,sat} \frac{b_A P^{v_A}}{1 + b_A P^{v_A}} + q_{B,sat} \frac{b_B P^{v_B}}{1 + b_B P^{v_B}}$$

$q$  is the adsorbed capacity per mass of adsorbent (mol/kg),  $q_{A,sat}$  and  $b_A$  are the saturation uptake capacities and the constant at site A, respectively and  $P$  is the total pressure of the gas at the equilibrium (kPa).

The adsorption selectivity defined as follows:

$$S_{ads} = \frac{q_A/q_B}{y_A/y_B}$$

where  $q_A$  and  $q_B$  represent the component molar loading within the MOFs and  $y_A$  and  $y_B$  are the corresponding mole fraction used in the feed gas mixture.

## 1.6 Rietveld refinement for NUC-301

The initial structural model for Rietveld refinement was referenced from the published InOF-12 crystallographic data. The refinement results of NUC-301 were obtained by the Rietveld method implemented in TOPAS software (Table S1, CCDC 2489857).

## 1.7 Grand canonical Monte Carlo simulations

The GCMC calculations were performed using the Sorption module in BIOVIA Materials Studio (version 8.0) under three-dimensional periodic boundary conditions.<sup>2</sup> The COMPASS force field was employed to describe interatomic interactions. The Ewald method was used to calculate the electrostatic energy, and the van der Waals energy was calculated within a cutoff distance of 12 Å. Each simulation consisted of  $2 \times 10^7$  equilibration moves followed by  $2 \times 10^7$  production moves to ensure convergence. Monte Carlo moves included molecular translations and rotations (for non-spherical molecules), as well as insertion and deletion of guest molecules. For gas molecules, LJ parameters for CH<sub>4</sub>, C<sub>2</sub>H<sub>6</sub> and C<sub>3</sub>H<sub>8</sub> were taken from the united-atom TraPPE force field,<sup>3</sup> as summarized in Table S5. GCMC simulations were then performed to study

the adsorption behaviors of CH<sub>4</sub>, C<sub>2</sub>H<sub>6</sub> and C<sub>3</sub>H<sub>8</sub> at 298 K and 1 bar. The primary adsorption sites were identified using the Adsorption Locator module by locating energetically favorable positions of guest molecules within the frameworks. The isosteric heats of adsorption ( $Q_{st}$ ) were calculated at 298 K using the fluctuation method implemented in the Sorption module.<sup>4</sup>

## 1.8 Transient breakthrough simulations

Transient breakthrough simulations were carried out for 85/10/5 CH<sub>4</sub>/C<sub>2</sub>H<sub>6</sub>/C<sub>3</sub>H<sub>8</sub> mixtures at 298 K and 100 kPa using the methodology described in earlier publications.<sup>5-9</sup> In these simulations, intra-crystalline diffusion influences are ignored.

The simulations were performed for a breakthrough tube with the following parameters:

Inside diameter of breakthrough tube = 4 mm

Length of packed bed = 120 mm

The flow rates at the inlet,  $Q_0 = 2 \text{ mL min}^{-1}$

The sample mass of MOF in the packed bed  $m_{ads} = 0.76 \text{ g}$ .

The MOF framework density,  $\rho = 812 \text{ kg m}^{-3}$ .

The mixture adsorption equilibrium were determined using the Ideal Adsorbed Solution Theory (IAST) of Myers and Prausnitz.<sup>10</sup>

The breakthrough data are presented in terms of the dimensionless concentrations at the exit of the fixed bed,  $c_i/c_{i0}$ , as function of the modified time parameter

$$\frac{(t = \text{time, min})}{(\text{g MOF packed in tube})} = \frac{t}{m_{ads}} = \text{min g}^{-1}.$$

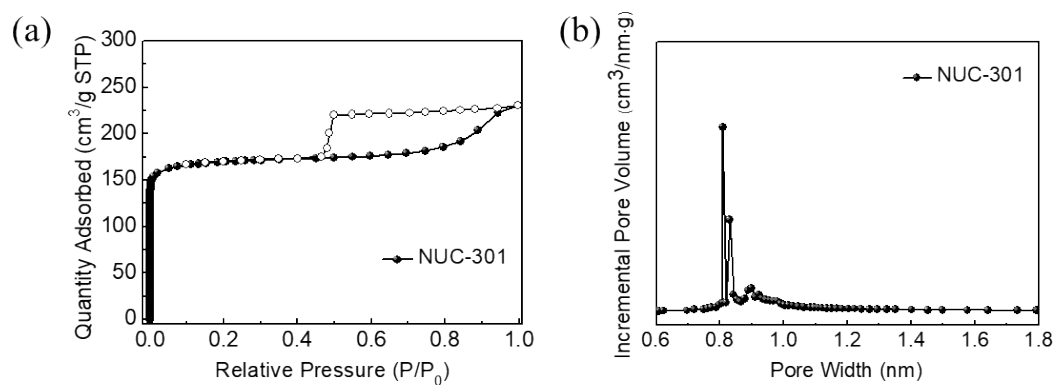

**Fig. S1.** (a) N<sub>2</sub> adsorption-desorption isotherms of NUC-301 at 77 K. (b) The pore distribution of NUC-301.

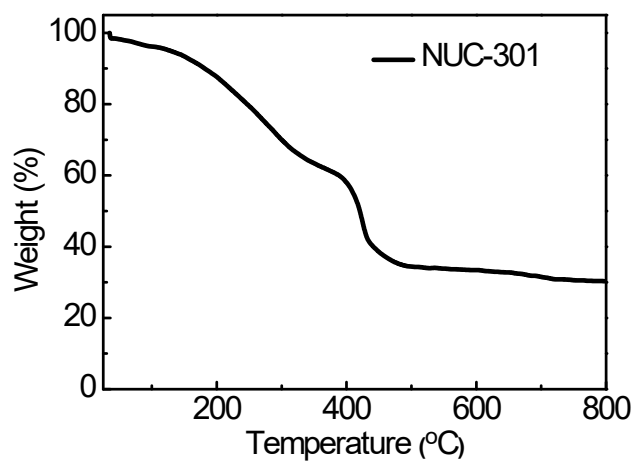

**Fig. S2.** TGA curves of NUC-301.

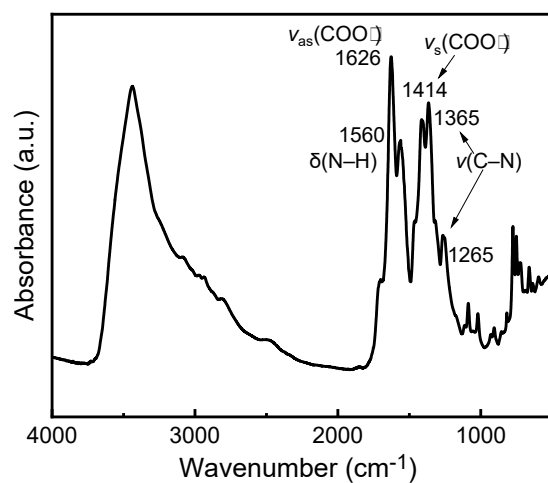

**Fig. S3.** The FT-IR spectra of activated NUC-301 samples.

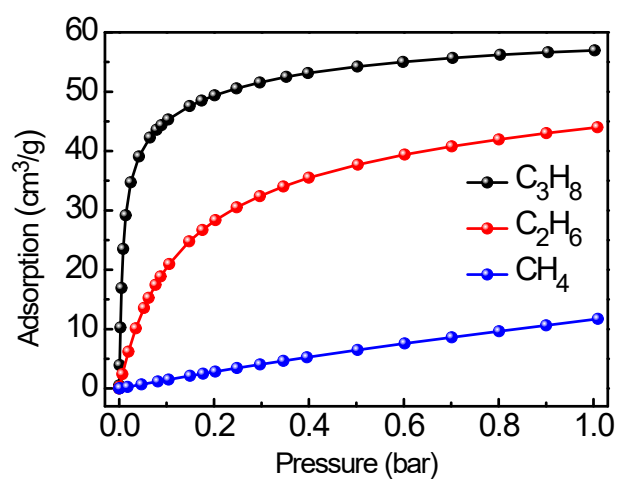

**Fig. S4.** The single-adsorption isotherms of NUC-301 for CH<sub>4</sub>, C<sub>2</sub>H<sub>6</sub> and C<sub>3</sub>H<sub>8</sub> at 288 K.

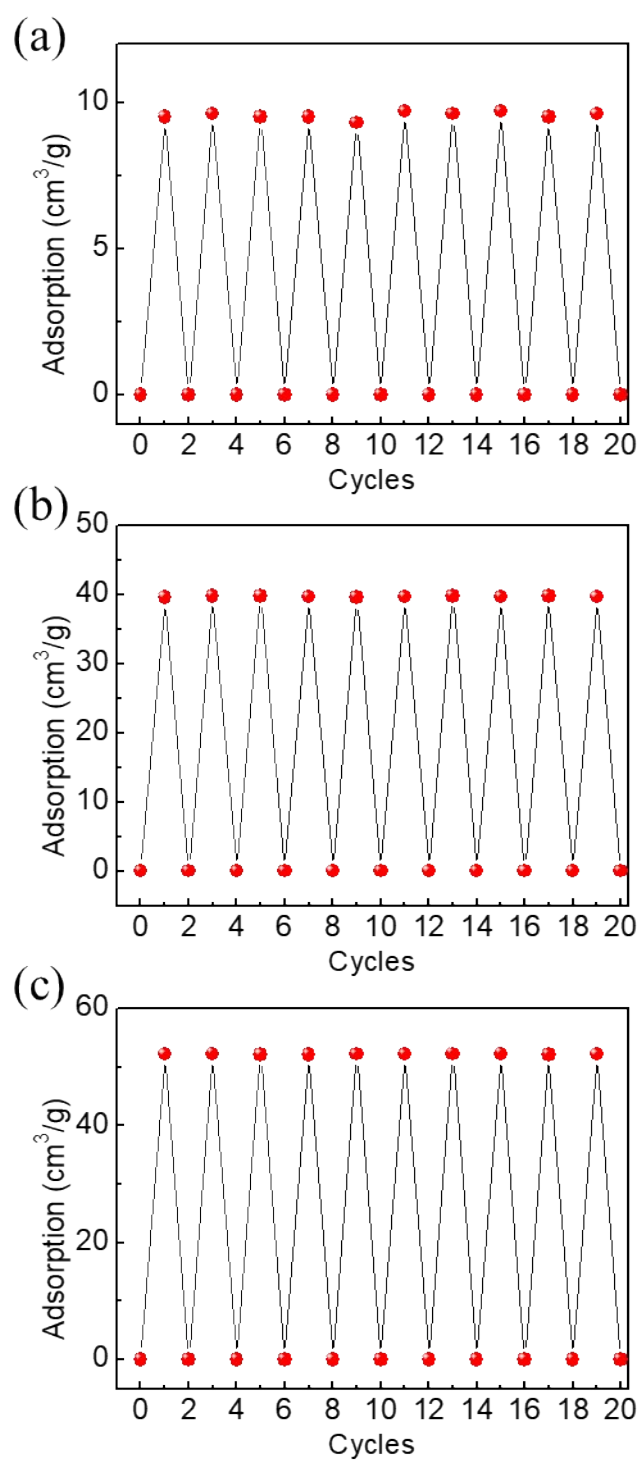

**Fig. S5** Cyclic (a) CH<sub>4</sub>, (b) C<sub>2</sub>H<sub>6</sub>, and (c) C<sub>3</sub>H<sub>8</sub> adsorption measurements on NUC-301 at 298 K and 1 bar.



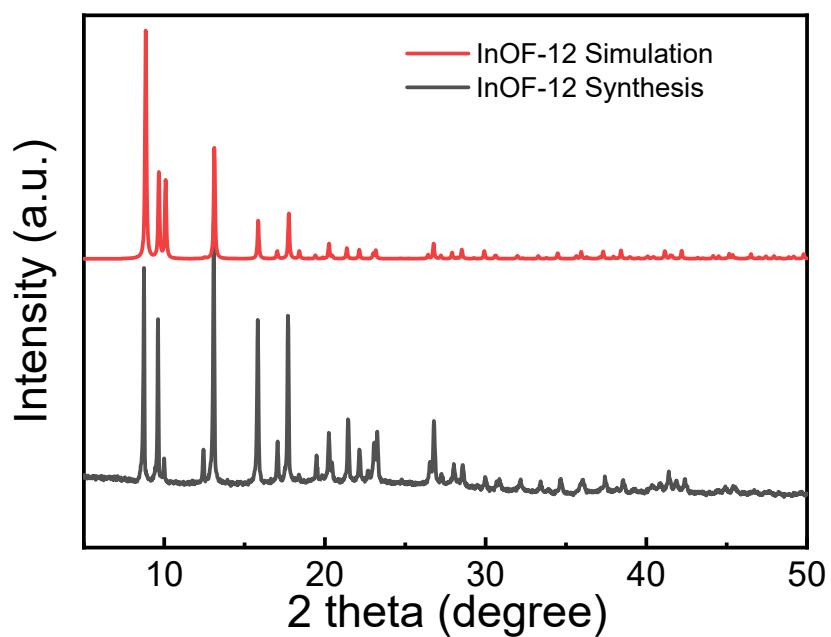

**Fig. S6.** PXRD patterns recorded for InOF-12.

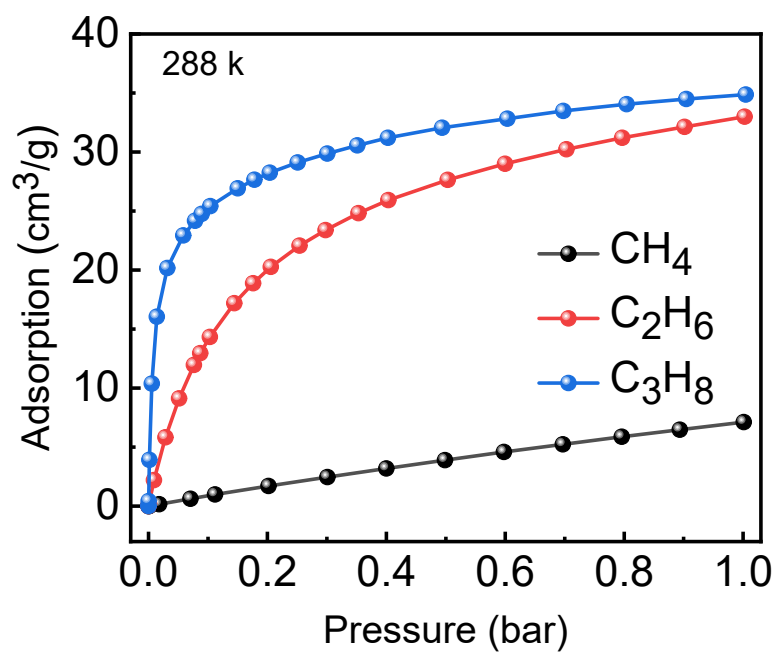

**Fig. S7.** The single-adsorption isotherms of InOF-12 for  $\text{CH}_4$ ,  $\text{C}_2\text{H}_6$  and  $\text{C}_3\text{H}_8$  at 288

K.

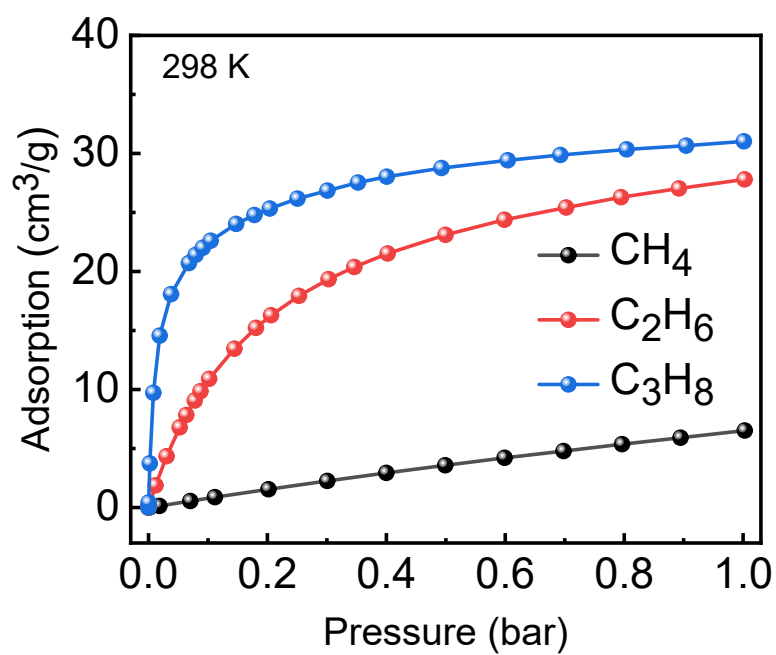

**Fig. S8.** The single-adsorption isotherms of InOF-12 for CH<sub>4</sub>, C<sub>2</sub>H<sub>6</sub> and C<sub>3</sub>H<sub>8</sub> at 298 K.

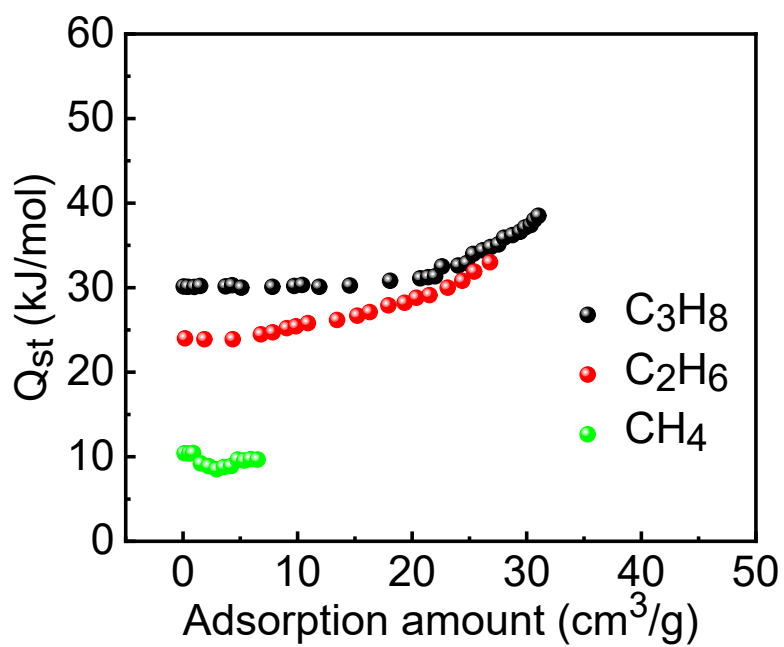

**Fig. S9.** The adsorption heats of InOF-12 for CH<sub>4</sub>, C<sub>2</sub>H<sub>6</sub> and C<sub>3</sub>H<sub>8</sub>.

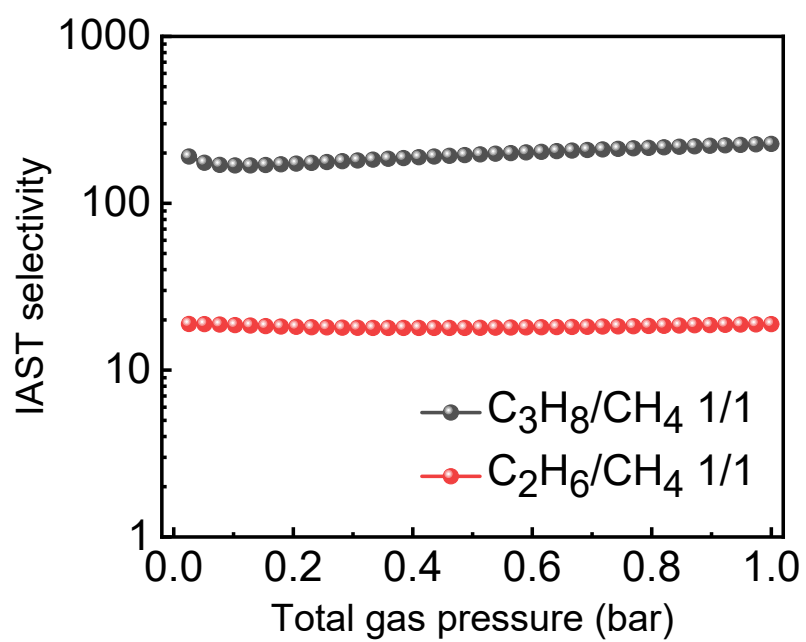

**Fig. S10.** The adsorption selectivity of  $\text{C}_3\text{H}_8/\text{CH}_4(1/1)$  and  $\text{C}_2\text{H}_6/\text{CH}_4$  (1/1) for InOF-12 at 298 K.

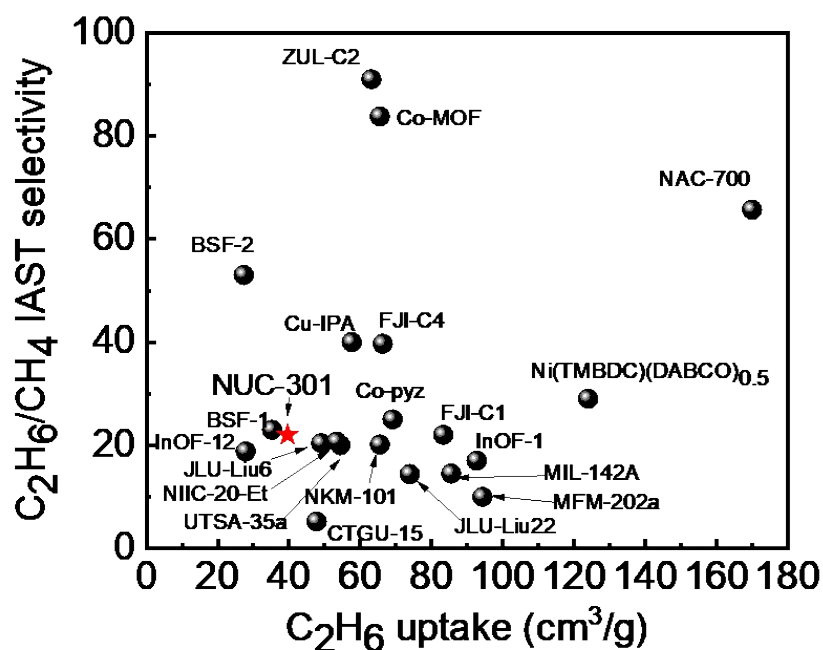

**Fig. S11** A comparison of the  $C_2H_6/CH_4$  adsorption selectivity and  $C_2H_6$  uptake for previously reported adsorbents.

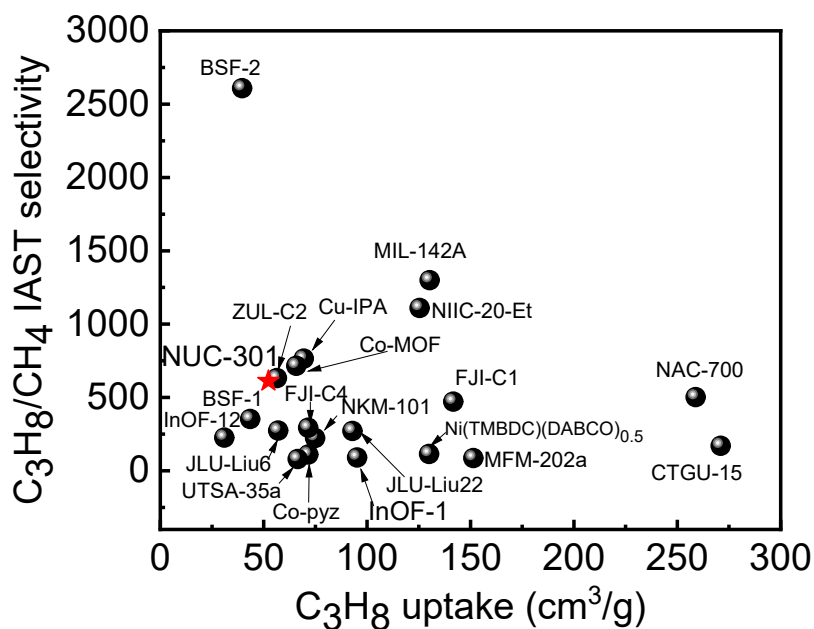

**Fig. S12** A comparison of the  $C_3H_8/CH_4$  adsorption selectivity and  $C_3H_8$  uptake for previously reported adsorbents.

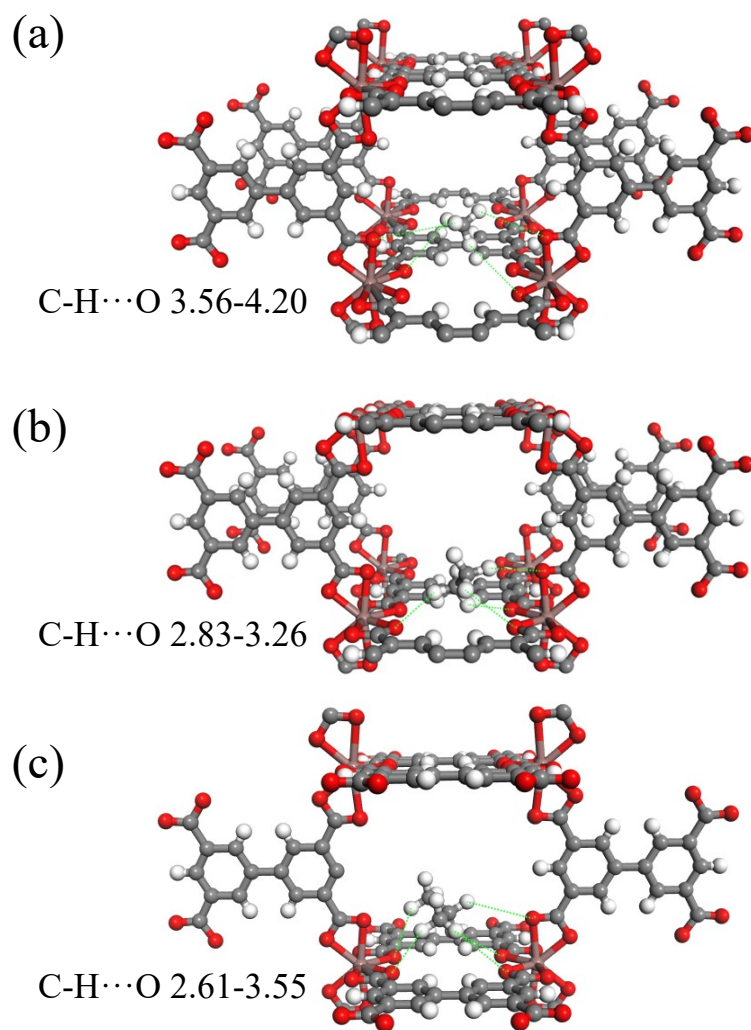

**Fig. S13** The main adsorption sites of InOF-12 for (a) CH<sub>4</sub>, (b) C<sub>2</sub>H<sub>6</sub>, and (c) C<sub>3</sub>H<sub>8</sub> were identified using GCMC simulations.

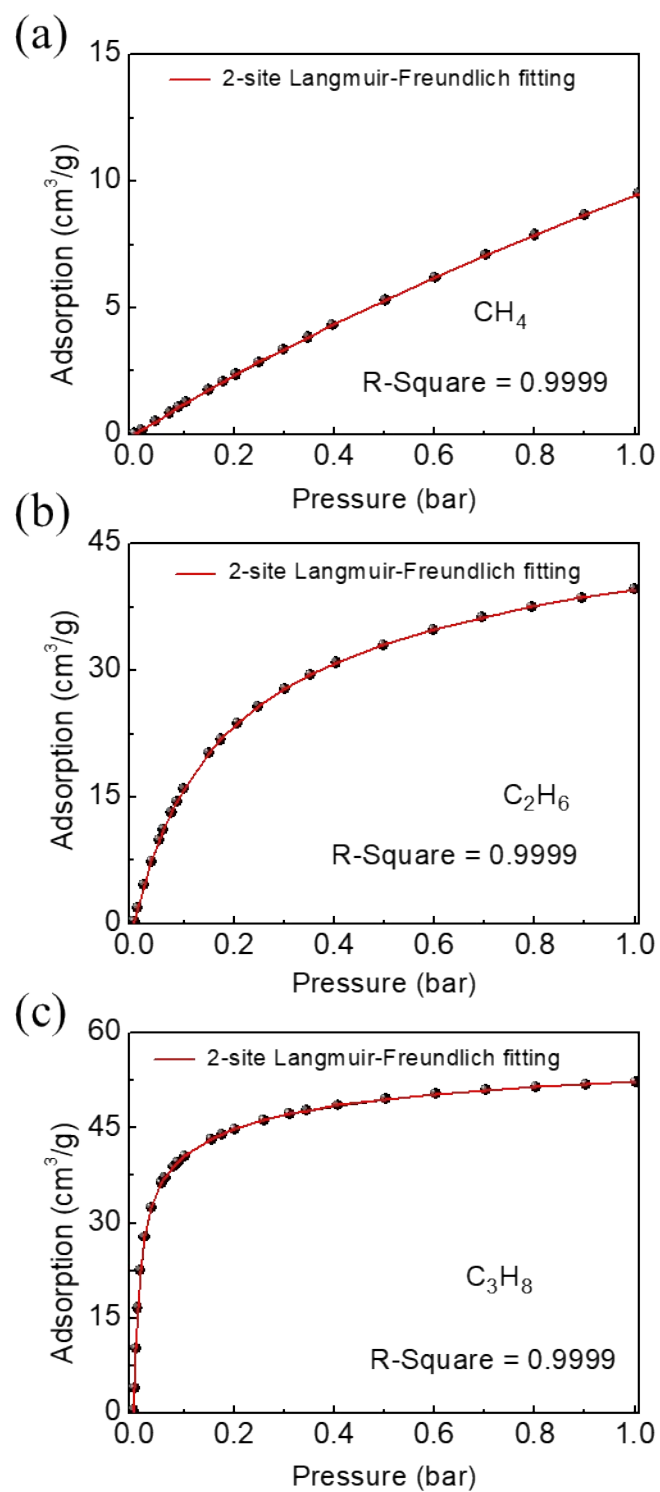

**Fig. S14**  $\text{CH}_4$ ,  $\text{C}_2\text{H}_6$  and  $\text{C}_3\text{H}_8$  adsorption isotherms at 298 K in NUC-301 with dual-site Langmuir-Freundlich model fits.

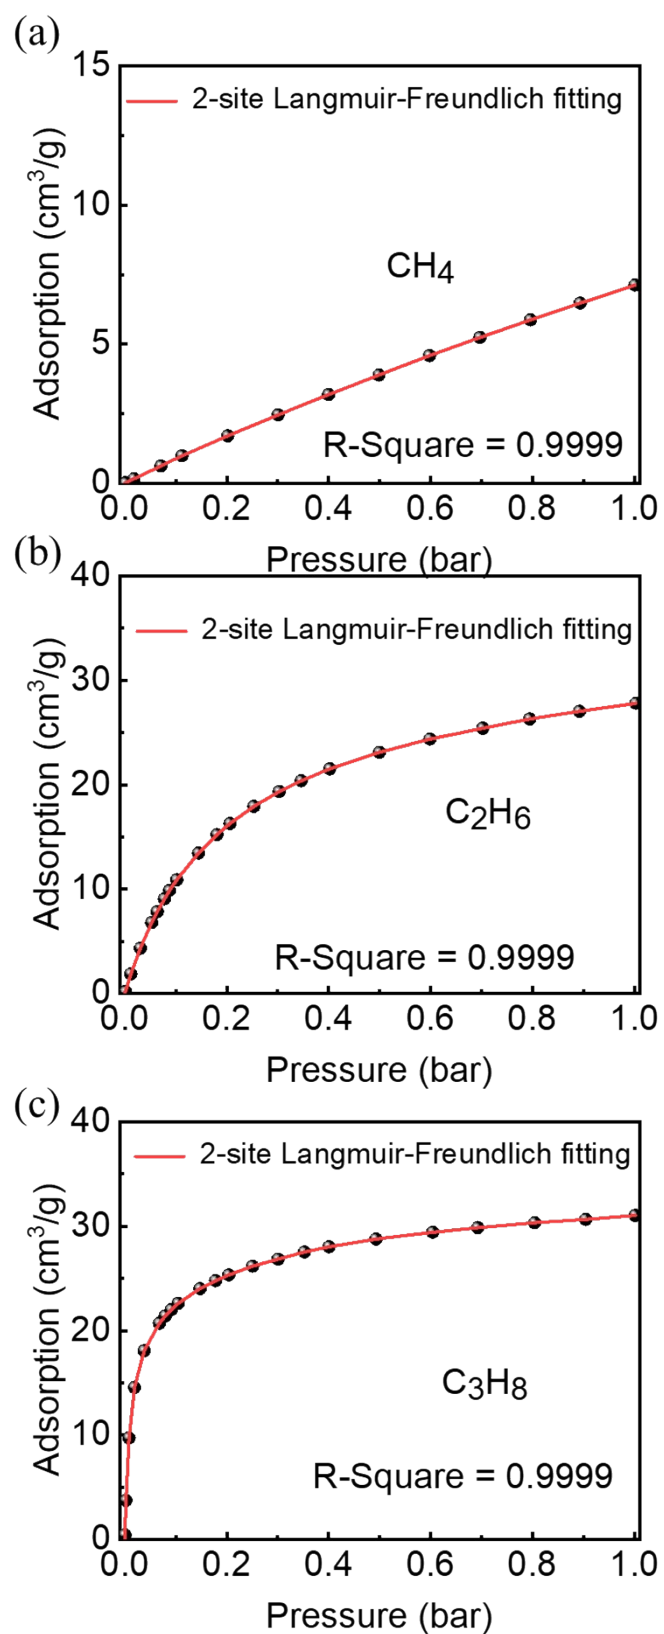

**Fig. S15**  $\text{CH}_4$ ,  $\text{C}_2\text{H}_6$  and  $\text{C}_3\text{H}_8$  adsorption isotherms at 298 K in InOF-12 with dual-site Langmuir-Freundlich model fits.

**Table S1.** Main parameters of processing refinement.

| compound             | NUC-301    |
|----------------------|------------|
| sp. gr.              | P 42/m m c |
| a (Å)                | 9.9607     |
| b (Å)                | 9.9607     |
| c (Å)                | 18.0472    |
| $\alpha$ (°)         | 90.0000    |
| $\beta$ (°)          | 90.0000    |
| $\gamma$ (°)         | 90.0000    |
| V (Å <sup>3</sup> )  | 1790.56    |
| no. of reflection    | 207        |
| 2 $\theta$ -interval | 5°-65°     |
| R <sub>wp</sub> (%)  | 6.36       |
| R <sub>p</sub> (%)   | 4.88       |
| R <sub>exp</sub> (%) | 5.46       |
| 2                    | 1.17       |

**Table S2** Physicochemical properties of CH<sub>4</sub>, C<sub>2</sub>H<sub>6</sub> and C<sub>3</sub>H<sub>8</sub><sup>11</sup>

| Structure                                                                                                         | Molecular size (Å <sup>3</sup> ) | Kinetic diameter (Å) | Boiling point (K) | Polarizability (×10 <sup>-25</sup> /cm <sup>3</sup> ) |
|-------------------------------------------------------------------------------------------------------------------|----------------------------------|----------------------|-------------------|-------------------------------------------------------|
| CH <sub>4</sub>                | 3.70 × 3.70 × 3.70               | 3.8                  | 111.6             | 26                                                    |
| C <sub>2</sub> H <sub>6</sub>  | 3.81 × 4.08 × 4.82               | 4.44                 | 184.6             | 44.3                                                  |
| C <sub>3</sub> H <sub>8</sub>  | 4.20 × 4.60 × 6.80               | 4.9                  | 230.9             | 62.9                                                  |



**Table S3** Summary of C<sub>2</sub>H<sub>6</sub>/C<sub>3</sub>H<sub>8</sub> adsorption capacities and IAST selectivities (for C<sub>2</sub>H<sub>6</sub>/CH<sub>4</sub> (1/1) and C<sub>3</sub>H<sub>8</sub>/CH<sub>4</sub> (1/1) mixtures) of reported MOFs at 298 K and 1 bar

| Adsorbents                          | C <sub>2</sub> H <sub>6</sub><br>(cm <sup>3</sup> /g) | C <sub>3</sub> H <sub>8</sub><br>(cm <sup>3</sup> /g) | C <sub>2</sub> H <sub>6</sub> /CH <sub>4</sub><br>selectivity | C <sub>3</sub> H <sub>8</sub> /CH <sub>4</sub><br>selectivity | Reference |
|-------------------------------------|-------------------------------------------------------|-------------------------------------------------------|---------------------------------------------------------------|---------------------------------------------------------------|-----------|
| Co-pyz                              | 69.1                                                  | 71.6                                                  | 25                                                            | 111                                                           | [12]      |
| CTGU-15                             | 47.7                                                  | 271                                                   | 5.2                                                           | 170.7                                                         | [13]      |
| JLU-Liu6                            | 49                                                    | 57                                                    | 20.4                                                          | 274.6                                                         | [14]      |
| UTSA-35a                            | 54.4                                                  | 66.5                                                  | 20                                                            | 80                                                            | [15]      |
| JLU-Liu22                           | 73.9                                                  | 92.9                                                  | 14.4                                                          | 271.5                                                         | [16]      |
| MFM-202                             | 94.3                                                  | 151.4                                                 | 10                                                            | 87                                                            | [17]      |
| Ni(TMBDC)(DABC<br>O) <sub>0.5</sub> | 124                                                   | 130                                                   | 29                                                            | 115                                                           | [18]      |
| NKM-101                             | 65.5                                                  | 74.9                                                  | 20.1                                                          | 223.1                                                         | [19]      |
| InOF-1                              | 92.7                                                  | 95.2                                                  | 17                                                            | 91                                                            | [20]      |
| Cu-IPA                              | 57.6                                                  | 69.4                                                  | 40                                                            | 765                                                           | [21]      |
| ZUL-C2                              | 63.1                                                  | 56.4                                                  | 91                                                            | 632                                                           | [22]      |
| BSF-1                               | 35.2                                                  | 43.5                                                  | 23                                                            | 353                                                           | [23]      |
| Co-MOF                              | 65.5                                                  | 65.8                                                  | 83.8                                                          | 715.6                                                         | [24]      |
| NAC-700                             | 170                                                   | 258.9                                                 | 65.7                                                          | 501.9                                                         | [25]      |
| FJI-C4                              | 66.3                                                  | 71.5                                                  | 39.7                                                          | 293.4                                                         | [26]      |
| FJI-C1                              | 83.3                                                  | 141.7                                                 | 22                                                            | 471                                                           | [27]      |
| BSF-2                               | 27.3                                                  | 39.6                                                  | 53                                                            | 2609                                                          | [28]      |
| MIL-142A                            | 85.5                                                  | 130.3                                                 | 14.5                                                          | 1300                                                          | [29]      |
| NIIC-20-Et                          | 53.4                                                  | 125.4                                                 | 20.7                                                          | 1110                                                          | [30]      |
| InOF-12                             | 27.8                                                  | 31                                                    | 18.8                                                          | 226.5                                                         | This work |

|         |      |      |    |     |           |
|---------|------|------|----|-----|-----------|
| NUC-301 | 39.6 | 52.3 | 22 | 612 | This work |
|---------|------|------|----|-----|-----------|

**Table S4** A comparison of adsorption performances of NUC-301 and InOF-12 (conditions: 298 K, 1 bar; 1:1 v/v for selectivity; near-zero coverage for isosteric heat).

|                                                                 | NUC-301 | InOF-12 |
|-----------------------------------------------------------------|---------|---------|
| CH <sub>4</sub> (cm <sup>3</sup> /g)                            | 9.5     | 6.5     |
| C <sub>2</sub> H <sub>6</sub> (cm <sup>3</sup> /g)              | 39.6    | 27.8    |
| C <sub>3</sub> H <sub>8</sub> (cm <sup>3</sup> /g)              | 52.3    | 31      |
| C <sub>2</sub> H <sub>6</sub> /CH <sub>4</sub> selectivity      | 22      | 18.8    |
| C <sub>3</sub> H <sub>8</sub> /CH <sub>4</sub> selectivity      | 612     | 226.5   |
| Experimental $Q_{st}$ of CH <sub>4</sub> (kJ/mol)               | 13.1    | 10.4    |
| Experimental $Q_{st}$ of C <sub>2</sub> H <sub>6</sub> (kJ/mol) | 26.3    | 24.1    |
| Experimental $Q_{st}$ of C <sub>3</sub> H <sub>8</sub> (kJ/mol) | 33.8    | 30.1    |
| Calculated $Q_{st}$ of CH <sub>4</sub> (kJ/mol)                 | 16.7    | 13.7    |
| Calculated $Q_{st}$ of C <sub>2</sub> H <sub>6</sub> (kJ/mol)   | 29.5    | 28.3    |
| Calculated $Q_{st}$ of C <sub>3</sub> H <sub>8</sub> (kJ/mol)   | 36.7    | 33.5    |

**Table S5** Charges and Lennard-Jones parameters of CH<sub>4</sub>, C<sub>2</sub>H<sub>6</sub> and C<sub>3</sub>H<sub>8</sub> molecules.

| Atom type                                      | $\sigma$ (Å) | $\varepsilon$ (K) | Charge (e) |
|------------------------------------------------|--------------|-------------------|------------|
| CH <sub>4</sub>                                | 3.73         | 148               | 0          |
| CH <sub>3</sub> _C <sub>2</sub> H <sub>6</sub> | 3.75         | 98                | 0          |
| CH <sub>3</sub> _C <sub>3</sub> H <sub>8</sub> | 3.75         | 98                | 0          |
| CH <sub>2</sub> _C <sub>3</sub> H <sub>8</sub> | 3.95         | 46                | 0          |

**Table S6** Dual-Langmuir-Freundlich fitting parameters for CH<sub>4</sub>, C<sub>2</sub>H<sub>6</sub> and C<sub>3</sub>H<sub>8</sub> in NUC-301 at 298 K.

|                               |                                 | Site A            |               |                                 | Site B            |               | R <sup>2</sup> |
|-------------------------------|---------------------------------|-------------------|---------------|---------------------------------|-------------------|---------------|----------------|
|                               | $q_{A,sat}$                     | $b_A$             | $\nu_A$       | $q_{B,sat}$                     | $b_B$             | $\nu_B$       |                |
|                               | cm <sup>3</sup> g <sup>-1</sup> | bar <sup>-1</sup> | dimensionless | cm <sup>3</sup> g <sup>-1</sup> | bar <sup>-1</sup> | dimensionless |                |
| CH <sub>4</sub>               | 29.19                           | 0.28              | 1.35          | 4.22                            | 2.69              | 1.03          | 0.9999         |
| C <sub>2</sub> H <sub>6</sub> | 27.27                           | 0.63              | 0.86          | 32.56                           | 8.18              | 1.05          | 0.9999         |
| C <sub>3</sub> H <sub>8</sub> | 20.81                           | 4.12              | 0.92          | 35.64                           | 235.12            | 1.17          | 0.9999         |

**Table S7** Dual-Langmuir-Freundlich fitting parameters for CH<sub>4</sub>, C<sub>2</sub>H<sub>6</sub> and C<sub>3</sub>H<sub>8</sub> in InOF-12 at 298 K.

|                               | Site A                          |                   |               | Site B                          |                   |               | R <sup>2</sup> |
|-------------------------------|---------------------------------|-------------------|---------------|---------------------------------|-------------------|---------------|----------------|
|                               | $q_{A,sat}$                     | $b_A$             | $\nu_A$       | $q_{B,sat}$                     | $b_B$             | $\nu_B$       |                |
|                               | cm <sup>3</sup> g <sup>-1</sup> | bar <sup>-1</sup> | dimensionless | cm <sup>3</sup> g <sup>-1</sup> | bar <sup>-1</sup> | dimensionless |                |
| CH <sub>4</sub>               | 23.42                           | 0.31              | 1.29          | 2.14                            | 2.88              | 0.96          | 0.9999         |
| C <sub>2</sub> H <sub>6</sub> | 32.42                           | 4.66              | 0.97          | 358.1                           | 0.003             | 1.89          | 0.9999         |
| C <sub>3</sub> H <sub>8</sub> | 20.37                           | 106.63            | 1.01          | 14.49                           | 2.91              | 0.91          | 0.9999         |

## References

1. J. Qian, P. Yu, K. Su, Y. Dong, S. Huang and M. Hong, *CrystEngComm*, 2015, **17**, 8512-8518.
2. X.-W. Gu, J.-X. Wang, E. Wu, H. Wu, W. Zhou, G. Qian, B. Chen and B. Li, *J. Am. Chem. Soc.*, 2022, **144**, 2614-2623.
3. M. G. Martin and J. I. Siepmann, *J. Phys. Chem. B*, 1998, **102**, 2569-2577.
4. L. Song, H.-T. Zheng, Z.-Q. Zhou, X.-Y. Zhu, C.-X. Chen, J.-J. Jiang, D. Fenske, X.-H. Xiong, J. Guo and Z.-W. Wei, *Sep. Purif. Technol.*, 2025, 135493.
5. R. Krishna, *Microporous Mesoporous Mater.*, 2014, **185**, 30-50.
6. R. Krishna, *RSC Advances*, 2015, **5**, 52269-52295.
7. R. Krishna, *RSC Advances*, 2017, **7**, 35724-35737.
8. R. Krishna, *Sep. Purif. Technol.*, 2018, **194**, 281-300.
9. R. Krishna, *ACS Omega*, 2020, **5**, 16987-17004.

10. A. L. Myers and J. M. Prausnitz, *AlChE J.*, 1965, **11**, 121-127.
11. J.-R. Li, R. J. Kuppler and H.-C. Zhou, *Chemical Society Reviews*, **2009**, 38, 1477-1504.
12. L. Zhao, P. Liu, C. Deng, T. Wang, S. Wang, Y.-J. Tian, J.-S. Zou, X.-C. Wu, Y. Zhang and Y.-L. Peng, *Nano Res.*, 2023, **16**, 12338-12344.
13. D. Lv, Z. Liu, F. Xu, H. Wu, W. Yuan, J. Yan, H. Xi, X. Chen and Q. Xia, *Sep. Purif. Technol.*, 2021, **266**, 118198.
14. D. Wang, T. Zhao, Y. Cao, S. Yao, G. Li, Q. Huo and Y. Liu, *Chem. Commun.*, 2014, **50**, 8648-8650.
15. Y. He, Z. Zhang, S. Xiang, F. R. Fronczek, R. Krishna and B. Chen, *Chem. Commun.*, 2012, **48**, 6493-6495.
16. D. Wang, B. Liu, S. Yao, T. Wang, G. Li, Q. Huo and Y. Liu, *Chem. Commun.*, 2015, **51**, 15287-15289.
17. S. Gao, C. G. Morris, Z. Lu, Y. Yan, H. G. Godfrey, C. Murray, C. C. Tang, K. M. Thomas, S. Yang and M. Schröder, *Chem. Mater.*, 2016, **28**, 2331-2340.
18. Y. Wu, Z. Liu, J. Peng, X. Wang, X. Zhou and Z. Li, *ACS Appl. Mater. Interfaces* 2020, **12**, 51499-51505.
19. Y. Qiao, X. Chang, J. Zheng, M. Yi, Z. Chang, M.-H. Yu and X.-H. Bu, *Inorg. Chem.*, 2021, **60**, 2749-2755.
20. Y. Chen, Z. Qiao, D. Lv, H. Wu, R. Shi, Q. Xia, H. Wang, J. Zhou and Z. Li, *Ind. Eng. Chem. Res.*, 2017, **56**, 4488-4495.
21. D. Lin, S. Tu, L. Yu, Y. Yuan, Y. Wu, X. Zhou, Z. Li and Q. Xia, *Ind. Eng.*

- Chem. Res.*, 2023, **62**, 5252-5261.
22. J. Zhou, T. Ke, F. Steinke, N. Stock, Z. Zhang, Z. Bao, X. He, Q. Ren and Q. Yang, *J. Am. Chem. Soc.*, 2022, **144**, 14322-14329.
23. Y. Zhang, L. Yang, L. Wang, S. Duttwyler and H. Xing, *Angew. Chem.*, 2019, **131**, 8229-8234.
24. S. M. Wang, L. Xu, L. P. Zhang, Y. T. Li, T. Wang and Q. Y. Yang, *Adv. Funct. Mater.*, 2025, 2504251.
25. J. Wang, R. Krishna, T. Yang and S. Deng, *J. Mater. Chem. A*, 2016, **4**, 13957-13966.
26. L. Li, X. Wang, J. Liang, Y. Huang, H. Li, Z. Lin and R. Cao, *ACS Appl. Mater. Interfaces*, 2016, **8**, 9777-9781.
27. Y. Huang, Z. Lin, H. Fu, F. Wang, M. Shen, X. Wang and R. Cao, *ChemSusChem*, 2014, **7**, 2647-2653.
28. Y. Zhang, L. Yang, L. Wang, X. Cui and H. Xing, *J. Mater. Chem. A*, 2019, **7**, 27560-27566.
29. Y. Yuan, H. Wu, Y. Xu, D. Lv, S. Tu, Y. Wu, Z. Li and Q. Xia, *Chem. Eng. J.*, 2020, **395**, 125057.
30. A. A. Lysova, K. A. Kovalenko, A. S. Nizovtsev, D. N. Dybtsev and V. P. Fedin, *Chem. Eng. J.*, 2023, **453**, 139642.
